# Supplementary material for: The Discovery of Small Allosteric and Active Site Inhibitors of the SARS-CoV-2 Main Protease via Structure-Based Virtual Screening and Biological Evaluation
Source: Molecules. 2022 Oct 9;27(19):6710. doi: 10.3390/molecules27196710 (PMC9572942; doi:10.3390/molecules27196710)
Supplement: Supplementary file 1 [file molecules-27-06710-s001.zip › molecules-1919371-supplementary.pdf]

## Supporting Information

### The Discovery of Small Leadlike Inhibitors of the SARS-CoV-2 Main Protease via Structure-Based Virtual Screening and Biological Evaluation

Radwa Mahgoub <sup>1,2</sup>, Fedah E. Mohamed <sup>3</sup>, Lara Alzyoud <sup>1,2</sup>, Bassam R. Ali <sup>3,4</sup>, Juliana Ferreira <sup>5</sup>, Wael M. Rabeh <sup>5</sup>, Shaikha S. AlNeyadi <sup>6</sup>, Noor Atatreh <sup>1,2</sup>, Mohammad A. Ghattas <sup>1,2\*</sup>

<sup>1</sup> College of Pharmacy, Al Ain University, Abu Dhabi 64141, United Arab Emirates

<sup>2</sup> AAU Health and Biomedical Research Center, Al Ain University, Abu Dhabi 64141, United Arab Emirates

<sup>3</sup> Department of Genetics and Genomics, College of Medicine and Health Sciences, United Arab Emirates University, Al-Ain 15551, United Arab Emirates

<sup>4</sup> Zayed Centre for Health Sciences, United Arab Emirates University, Al-Ain 15551, United Arab Emirates

<sup>5</sup> Science Division, New York University Abu Dhabi, Abu Dhabi 129188, United Arab Emirates

<sup>6</sup> Department of Chemistry, College of Science, United Arab Emirates University, Al-Ain 15551, United Arab Emirates

\* Correspondence: mohammad.ghattas@aau.ac.ae; Tel.: +971-26133275

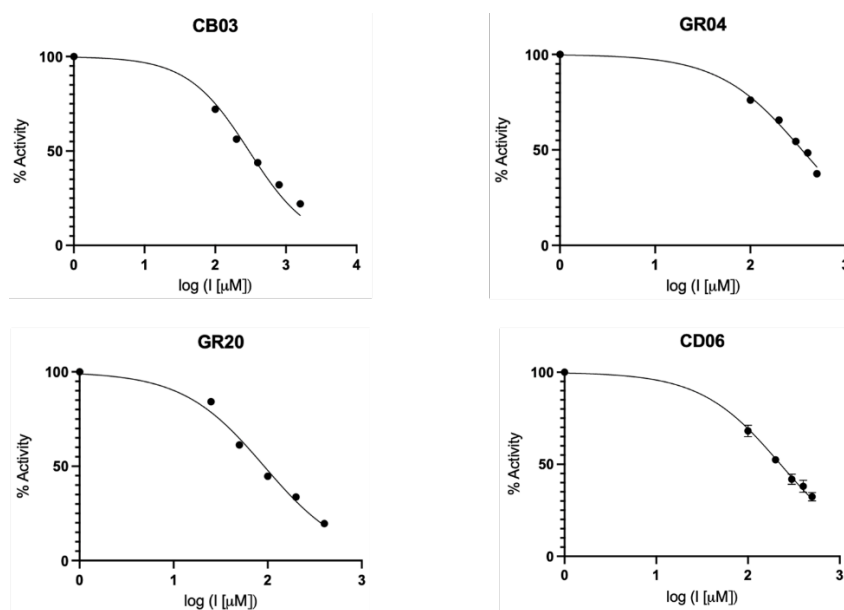

Figure S1. IC<sub>50</sub> Plots for Top Hits
